# Supplementary material for: Flow Rate and Water Depth Alters Biomass Production and Phytoremediation Capacity of Lemna minor
Source: MDPI journal article supplement (doi:10.3390/plants11162170), 2022-08-21
Supplement: s1 [file s1]

Table S2: Mean proportional change of nitrogen (TN mg g<sup>-1</sup>) and phosphorous (TP mg g<sup>-1</sup>) within the dry-weight biomass of *Lemna minor* cultivated within an indoor, vertically stacked system.

| Flow rate<br>(L min <sup>-1</sup> ) | Depth<br>(mm) | Nutrient content<br>(%) |                   |                   |
|-------------------------------------|---------------|-------------------------|-------------------|-------------------|
| <i>Total nitrogen</i>               |               | Tray 1<br>(Day 7)       | Tray 3<br>(Day 7) | Tray 5<br>(Day 7) |
| 0.5                                 | 25            | 130.0%                  | 131.9%            | 130.2%            |
| 1.5                                 | 25            | 115.9%                  | 110.2%            | 110.0%            |
| 3.0                                 | 25            | 103.1%                  | 92.9%             | 103.4%            |
| 0.5                                 | 50            | 125.0%                  | 121.5%            | 130.5%            |
| 1.5                                 | 50            | 143.7%                  | 137.2%            | 132.9%            |
| 3.0                                 | 50            | 116.3%                  | 125.5%            | 121.6%            |
| <i>Total phosphorous</i>            |               |                         |                   |                   |
| 0.5                                 | 25            | 89.2%                   | 97.2%             | 94.4%             |
| 1.5                                 | 25            | 84.7%                   | 82.4%             | 84.8%             |
| 3.0                                 | 25            | 84.0%                   | 72.9%             | 80.1%             |
| 0.5                                 | 50            | 131.9%                  | 137.4%            | 149.3%            |
| 1.5                                 | 50            | 148.9%                  | 147.8%            | 140.1%            |
| 3.0                                 | 50            | 126.4%                  | 141.8%            | 156.4%            |
