# Supplementary material for: Flow Rate and Water Depth Alters Biomass Production and Phytoremediation Capacity of Lemna minor
Source: MDPI journal article supplement (doi:10.3390/plants11162170), 2022-08-21
Supplement: s1 [file s1]

Table S1: Water chemistry analysis for a single sample of the commercially available nutrient additives prepared using distilled water. These samples were sent to an external lab for analysis (Aquatic Services Unit, Environmental Research Institute, University College Cork, Ireland). The media were composed following the manufacturers' instructions. The Advanced Nutrients medium consisted of pH Perfect Grow (2 ml L<sup>-1</sup>) and pH Perfect Micro (2 ml L<sup>-1</sup>), while the General Hydroponics medium consisted of FloraGrow (0.25 ml L<sup>-1</sup>) and FloraMicro (0.25 ml L<sup>-1</sup>).

| Water Chemistry Parameter  | Advanced Nutrients | General Hydroponics |
|----------------------------|--------------------|---------------------|
| BOD (mg O <sub>2</sub> /l) | 17.30              | 0.23                |
| COD (mg O <sub>2</sub> /l) | 203.00             | 4.56                |
| Total Solids (g/l)         | 1.26               | 0.13                |
| Total Nitrogen (mg N/l)    | 183.30             | 21.80               |
| Ammonia (mg N/l)           | 9.13               | 4.32                |
| Nitrate (mg N/l)           | 138.74             | 14.60               |
| Nitrite (mg N/l)           | <0.001             | <0.001              |
| Total Phosphorus (mg P/l)  | 0.87               | 1.89                |
| Orthophosphate (mg P/l)    | 0.65               | 1.69                |
| Chloride (mg Cl/l)         | 16.68              | 1.05                |
| Potassium (mg K/l)         | 135.00             | 19.11               |
| Sodium (mg Na/l)           | 3.20               | 0.39                |
| Calcium (mg Ca/l)          | 112.40             | 7.84                |
| Magnesium (mg Mg/l)        | 20.80              | 1.79                |
| Iron (µg Fe/l)             | 1506               | 260                 |
| Zinc (µg Zn/l)             | 573                | 38                  |
| Copper (µg Cu/l)           | 67                 | 19                  |
| Manganese (µg Mn/l)        | 1905               | 153                 |
